# Supplementary material for: The role of bone marrow-derived cells in the origin of liver cancer revealed by single-cell sequencing
Source: PubMed Central journal article supplement (PMC7142842; doi:10.20892/j.issn.2095-3941.2019.0369), 2020-02-15
Supplement: cbm-17-142-s001.pdf [file cbm-17-142-s001.pdf]

## Supplementary materials

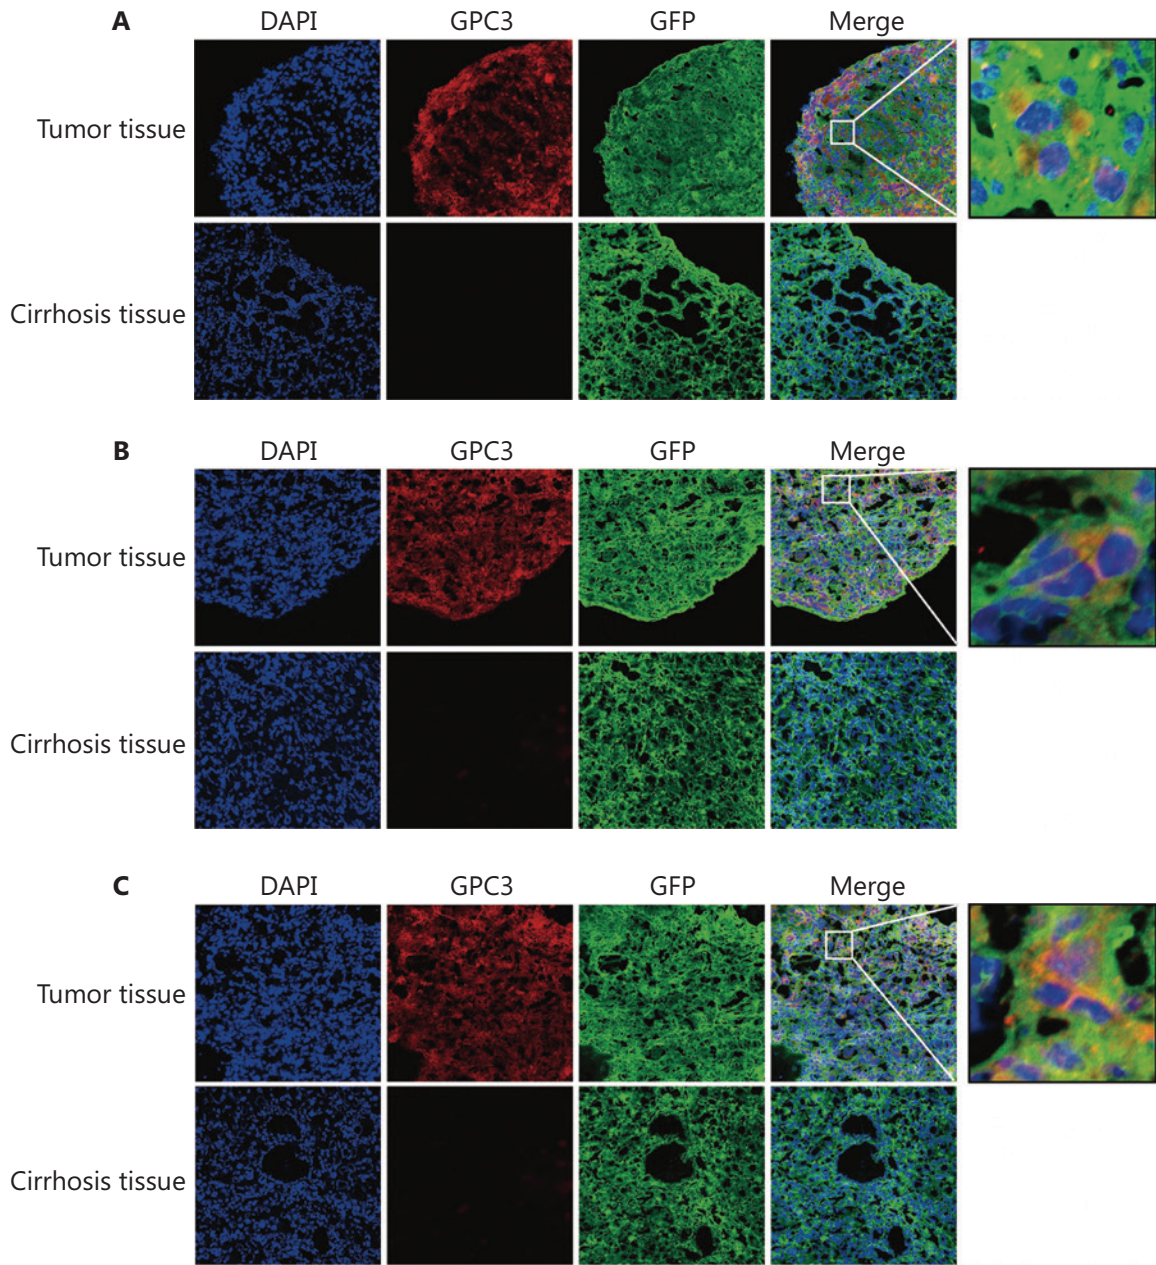

**Figure S1** Immunofluorescent colocalization of green fluorescent protein (GFP) and glypican 3 (GPC3) in A. Mouse #14; B. Mouse #22 and C. Mouse #30.

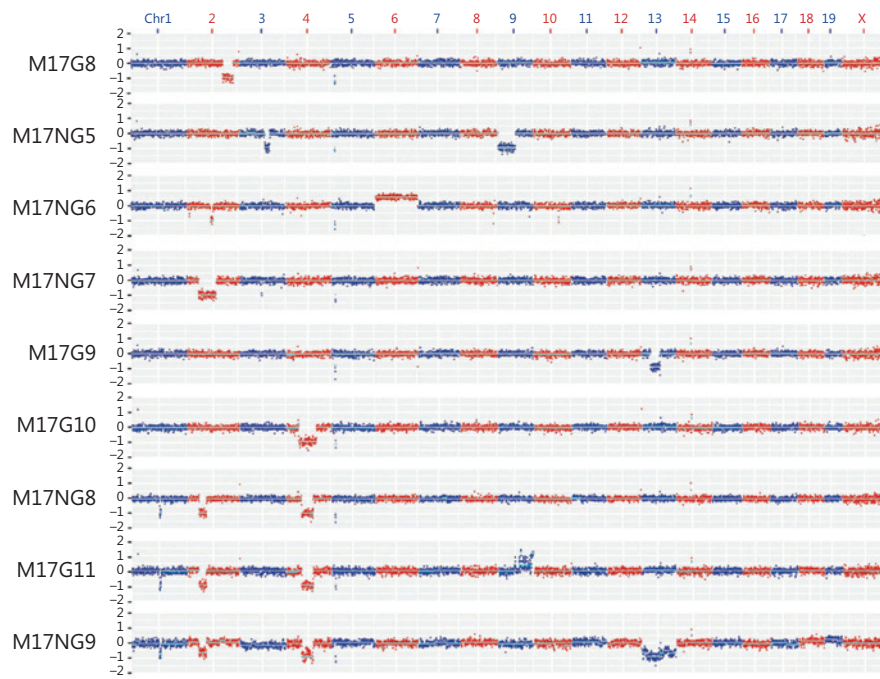

**Figure S2** Copy number alteration (CNA) patterns of diethylnitrosamine (DEN)-induced hepatocellular carcinoma (HCC) in Mouse #17. The copy number profile (blue and red dots) indicated by  $\log_2(\text{copy number ratio})$  is plotted along the genome with a bin size of 500 kb. (G: green cell, NG: non-green cell).

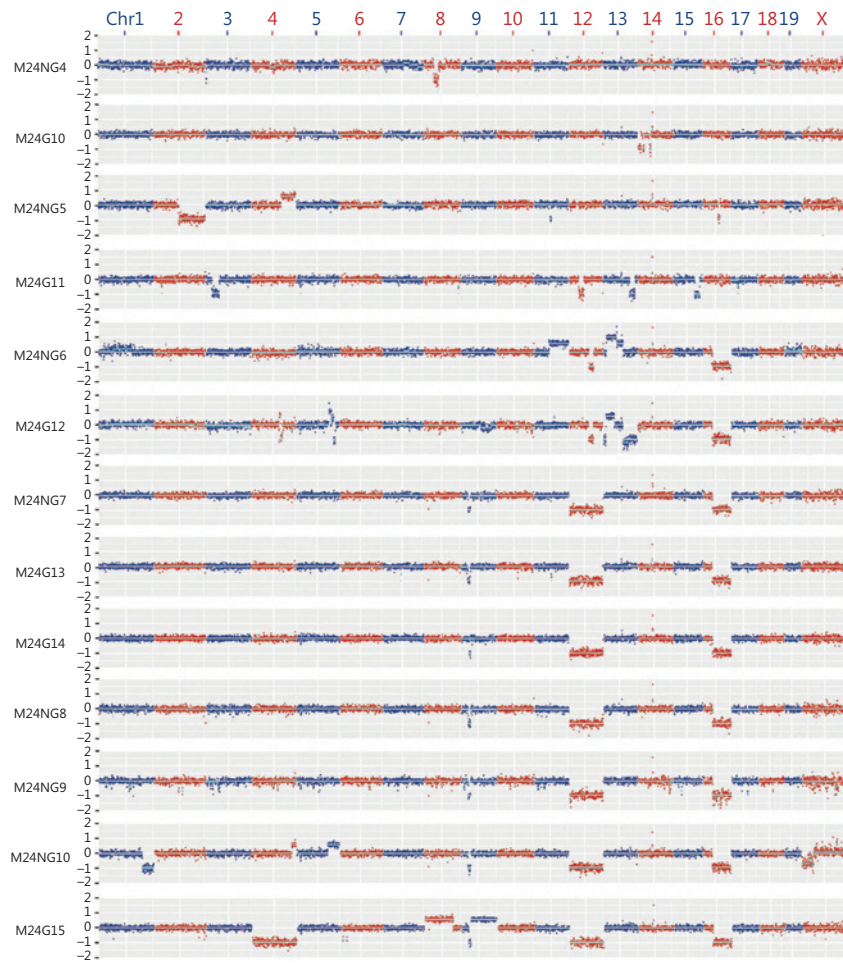

**Figure S3** CNA patterns of DEN-induced HCC in Mouse #24. The copy number profile (blue and red dots) indicated by  $\log_2$  (copy number ratio) is plotted along the genome with a bin size of 500 kb. (G: green cell, NG: non-green cell). Abbreviations are defined in **Figure S2**.

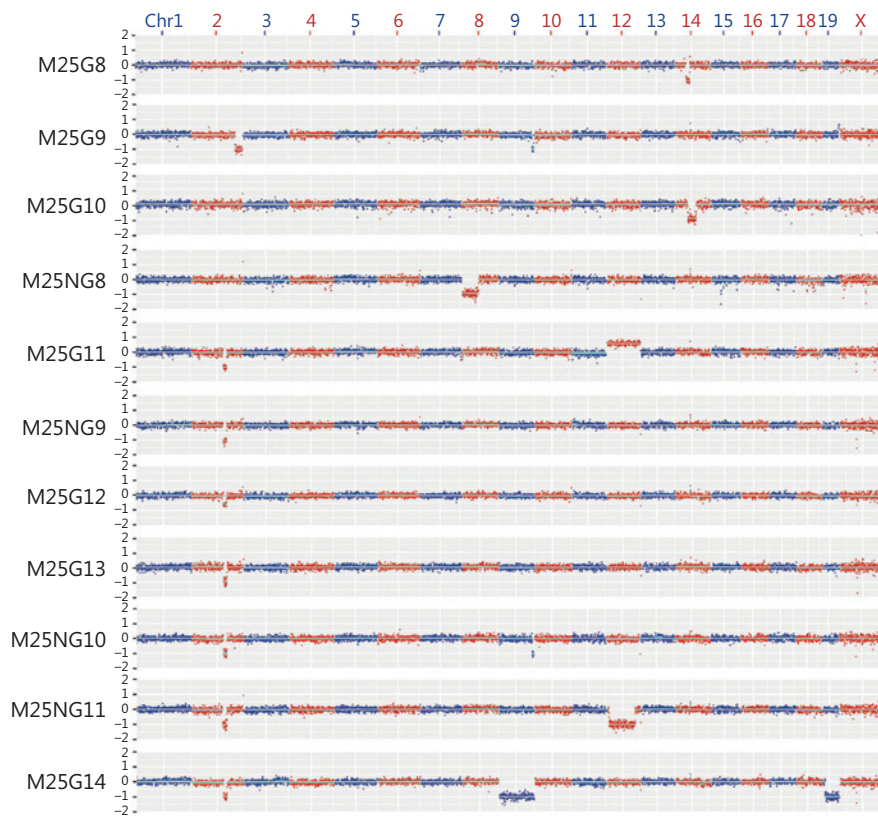

**Figure S4** CNA patterns of DEN-induced HCC in Mouse #25. The copy number profile (blue and red dots) indicated by  $\log_2$  (copy number ratio) is plotted along the genome with a bin size of 500 kb. (G: green cell, NG: non-green cell). Abbreviations are defined in **Figure S2**.



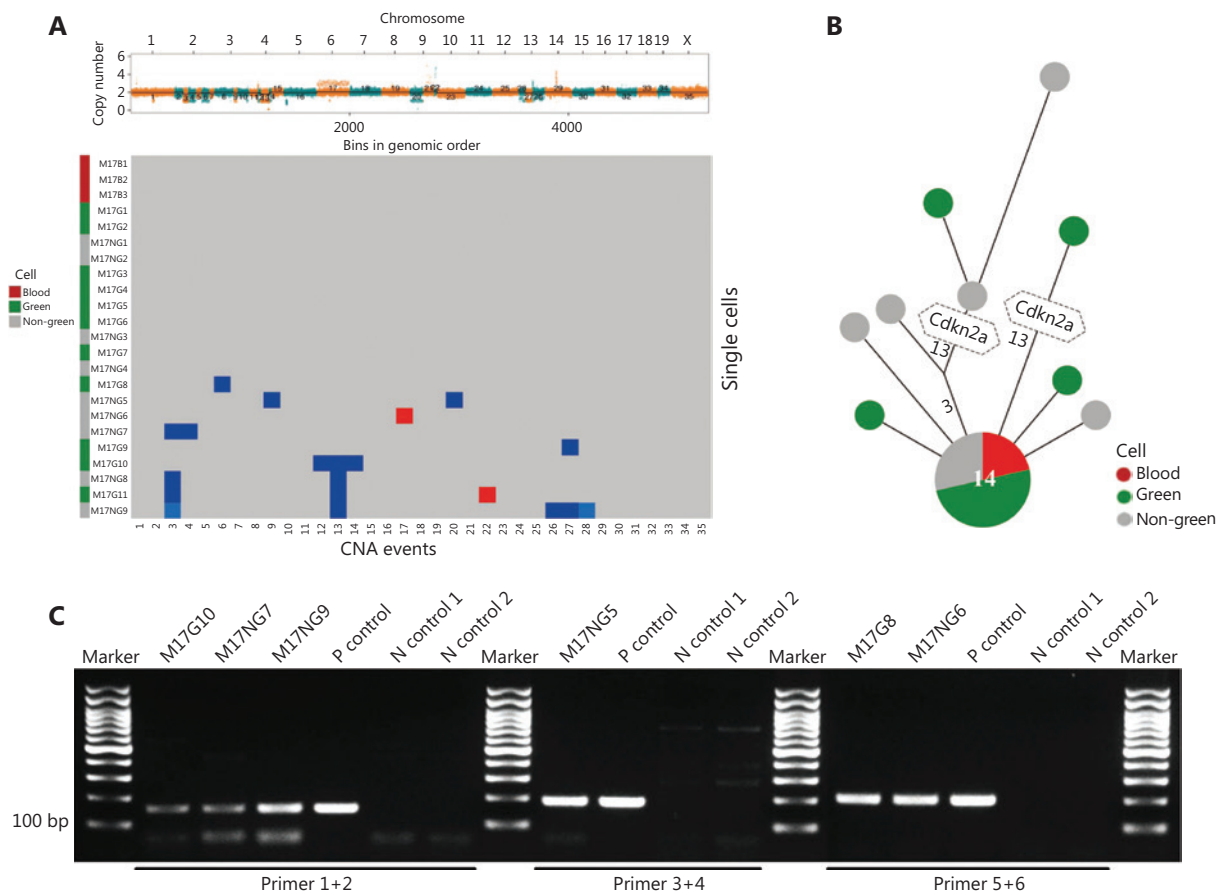

**Figure S5** Single-cell CNA revealed the origination and evolution of HCC in Mouse #17. (A) Multiple-cell segmentation (top) and trinary event matrices (bottom) for HCC from whole bone marrow (BM) transplantation mice. (B) A phylogenetic tree was constructed based on the CNA trinary event matrices of single cells. (C) Nested polymerase chain reaction (PCR) was used for detecting green fluorescent protein (GFP) at the single-cell level in Mouse #10 (P control: positive control from the genomic DNA of GFP mouse liver tissue. N control: negative control from wild-type mouse peripheral lymphocytes). Abbreviations are defined in **Figure S2**.

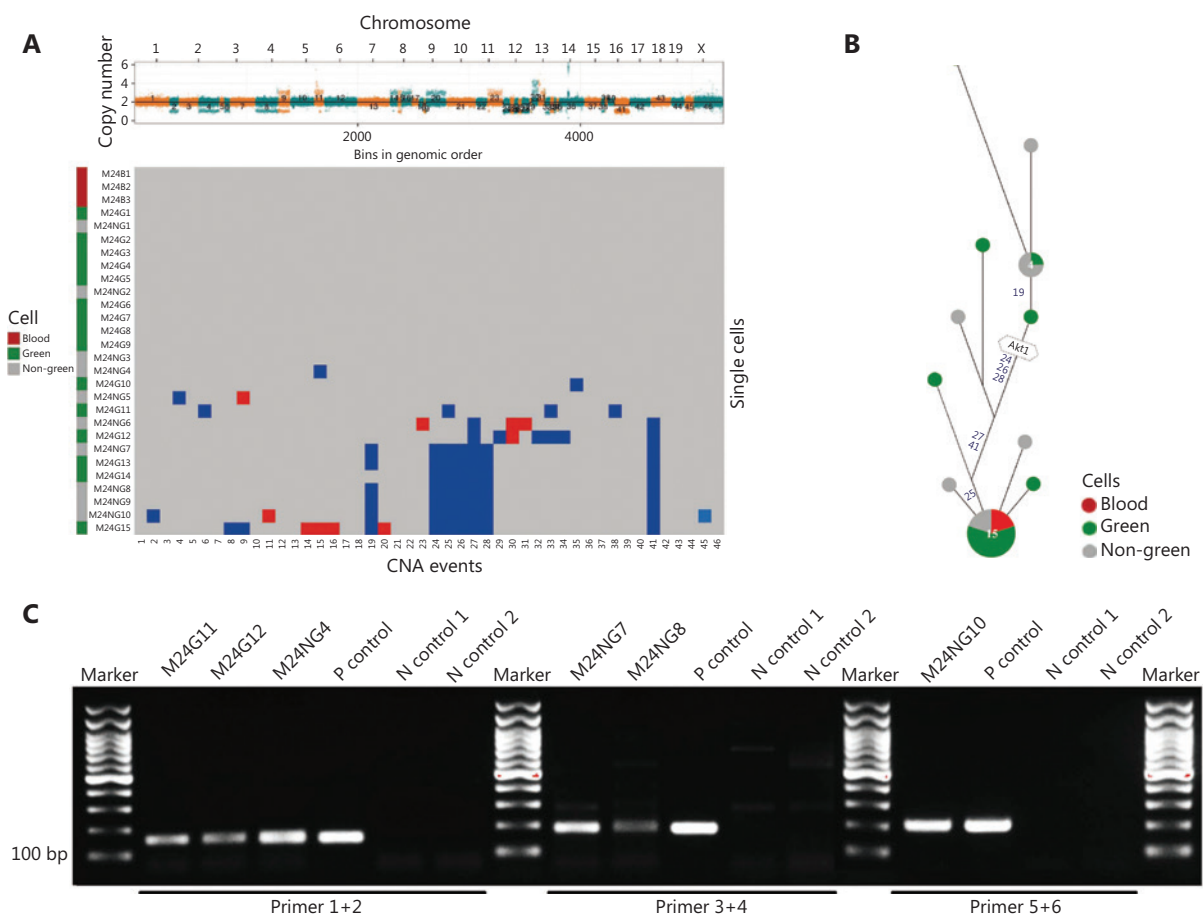

**Figure S6** Single-cell CNA revealed the origination and evolution of HCC in Mouse #24. (A) Multiple-cell segmentation (top) and trinary event matrices (bottom) for HCC from whole bone marrow-transplanted mice. (B) A phylogenetic tree was constructed based on the CNA trinary event matrices of single cells. (C) Nested PCR for detecting GFP at the single-cell level in Mouse #25 (P control: positive control from the genomic DNA of GFP mouse liver tissue. N control: negative control from wild-type mouse peripheral lymphocytes). Abbreviations are defined in **Figures S1 and S2**.

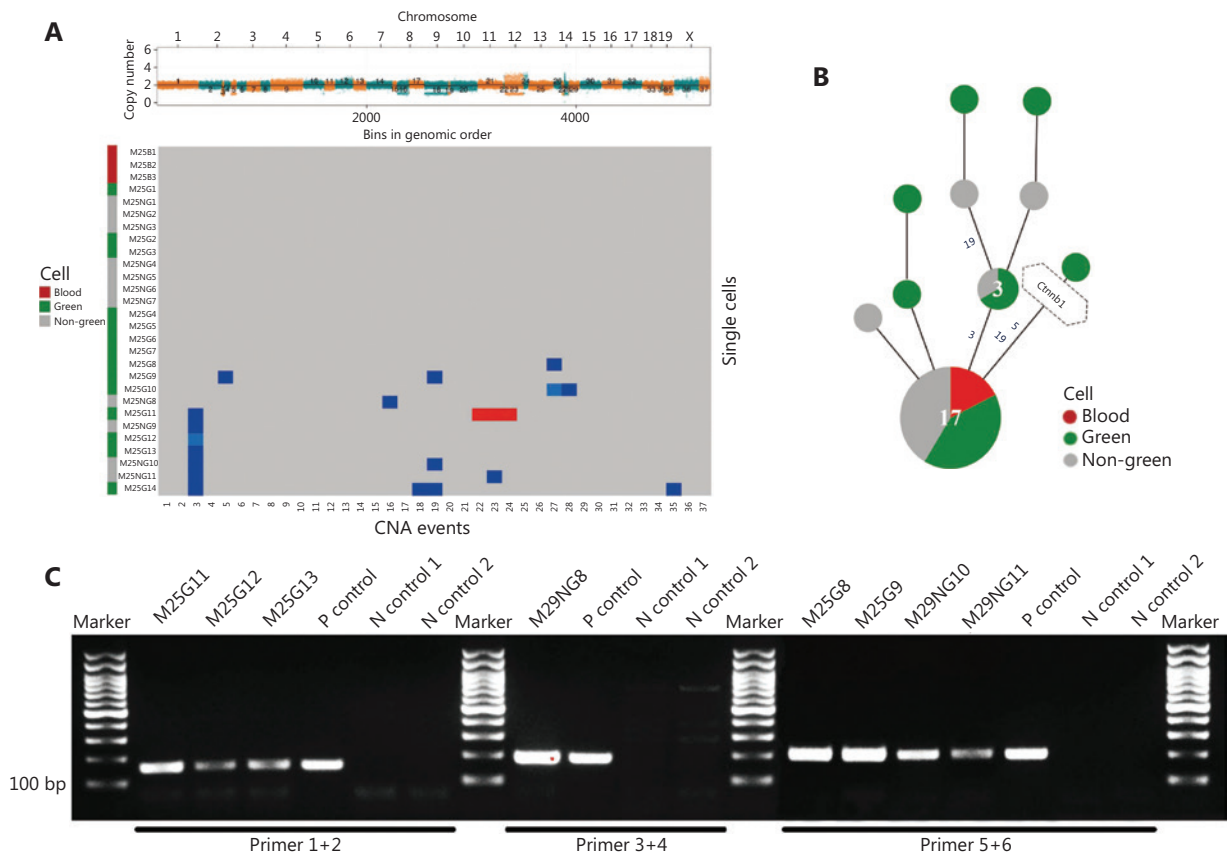

**Figure S7** Single-cell CNA revealed the origination and evolution of HCC in Mouse #25. (A) Multiple-cell segmentation (top) and trinary event matrices (bottom) for HCC from whole bone marrow-transplanted mice. (B) A phylogenetic tree was constructed based on the CNA trinary event matrices of single cells. (C) Nested PCR for detecting GFP at the single-cell level in Mouse #29 (P control: positive control from the genomic DNA of GFP mouse liver tissue. N control: negative control from wild-type mouse peripheral lymphocytes). Abbreviations are defined in **Figures S1 and S2**.

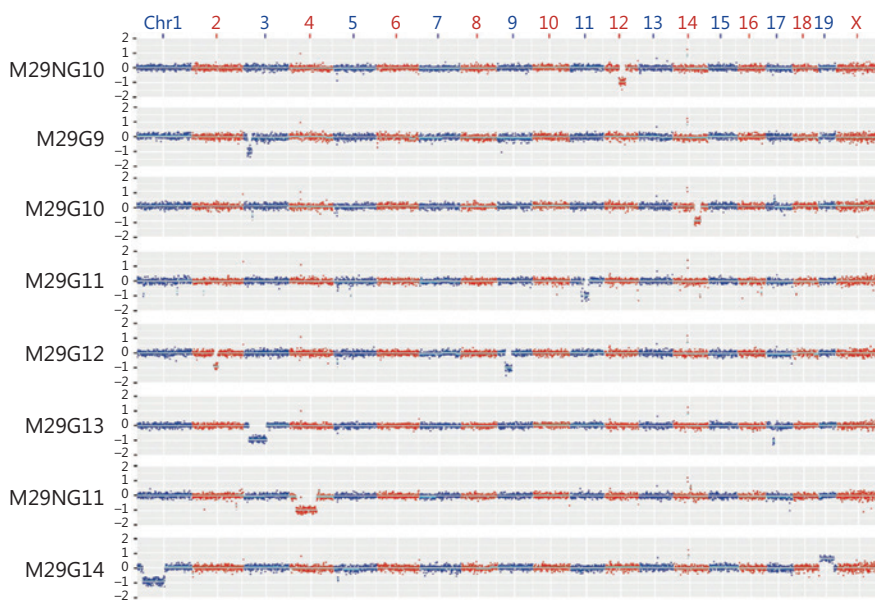

**Figure S8** CNA patterns of DEN-induced HCC in Mouse #29. The copy number profile (blue and red dots) indicated by  $\log_2$  (copy number ratio) is plotted along the genome with a bin size of 500 kb. (G: green cell, NG: non-green cell). Abbreviations are defined in **Figures S1 and S2**.

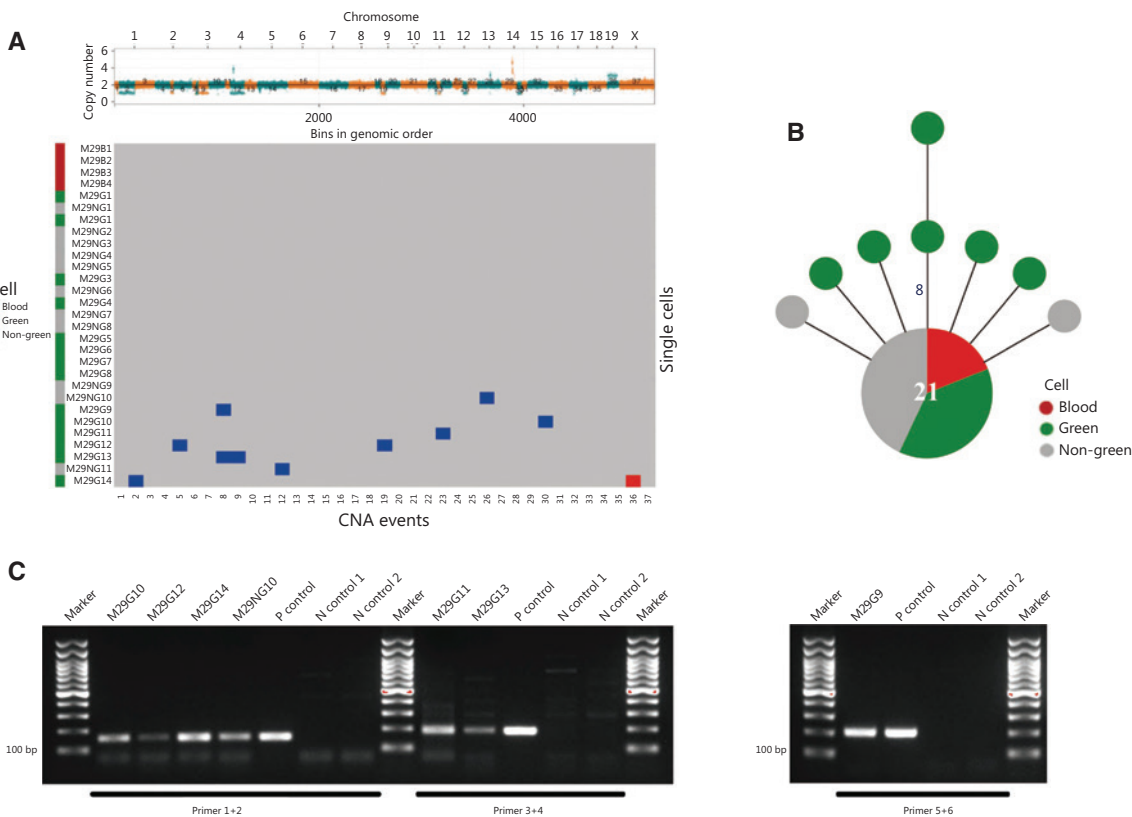

**Figure S9** The analysis of an early stage HCC case (Mouse #29) in the whole bone marrow transplantation mice. (A) Multiple-cell segmentation (top) and trinary event matrices (bottom) for HCC in Mouse 24. (B) A phylogenetic tree was constructed based on the CNA trinary event matrices of single cells. (C) Nested PCR for detecting GFP at the single-cell level in Mouse #24. (P control: positive control from the genomic DNA of GFP mouse liver tissue. N control: negative control from wild-type mouse peripheral lymphocytes). Abbreviations are defined in **Figures S1 and S2**.



**Table S1** Primers for quantitative polymerase chain reaction to test the genomic integrity of amplification products

| Primer | Sequence                                                   |
|--------|------------------------------------------------------------|
| 1      | F-GGAATGGGATTAGGAATGTATCAGC<br>R-GCTAATCCATGTGCTAGGCTTACCT |
| 2      | F-GTCCCTGAAATTATTGAAAGGGATG<br>R-TTCAGGACATCTCCATCTCATAGC  |
| 3      | F-GAAGCGAATCACAGTAGAGAACAGC<br>R-CCCTTACAGGCTGAGTTCTTCAAAT |
| 4      | F-CCCACTGATTTAACCAGGTTCTCT<br>R-GGAATCATTCTTCTCTGCCAAAGT   |
| 5      | F-AGCCTACAAGCAGTTTATCCCAAC<br>R-CCTTAAATCGTTCGGAGTTTCTTGT  |
| 6      | F-TGTTATCAGTAAGGGAGCTGCAGTG<br>R-AGCAGAGAACTCCAGAAAGGTAT   |
| 7      | F-CCTGACTACTGTCTGGATTCAAGGA<br>R-CATCTCCTTTCTTCTTGCCTTTA   |
| 8      | F-GATGCATGAATCAATCTTTGCTACC<br>R-GAGCCCTCACAAGTACAATCAGAGA |

F, means forward primers; R, means reverse primers.

**Table S2** Green fluorescent protein sequence primers

| Primer | Sequence                                          |
|--------|---------------------------------------------------|
| 1      | F-GGTGAACTTCAAGATCCGCC<br>R-CTTGTACAGCTCGTCCATGC  |
| 2      | F-GGTGAACTTCAAGATCCGCC<br>R-TCGTTGGGGTCTTTGCTCAG  |
| 3      | F-CGTAAACGGCCACAAGTTCAG<br>R-GCGGACTTGAAGAAGTCGTG |
| 4      | F-CGTAAACGGCCACAAGTTCAG<br>R-AAGTCGTGCTGCTTCATGTG |
| 5      | F-AGGAGCGCACCATCTTCTTC<br>R-CTCGATGTTGTGGCGGATCT  |
| 6      | F-GACGACGGCAACTACAAGAC<br>R-GGCGGATCTTGAAGTTCACC  |

F, means forward primers; R, means reverse primers.

**Table S3** Diethylnitrosamine (DEN)-induced hepatocellular carcinoma (HCC) in the whole bone marrow-transplanted C57BL/6 mice

| Mice number | Strain  | Tumor | Diameter | Induction time | Application                 |
|-------------|---------|-------|----------|----------------|-----------------------------|
| Mouse #1    | C57BL/6 | √     | –        | 14 weeks (DIE) | –                           |
| Mouse #2    | C57BL/6 | ×     | –        | 16 weeks       | –                           |
| Mouse #3    | C57BL/6 | ×     | –        | 16 weeks       | –                           |
| Mouse #4    | C57BL/6 | ×     | –        | 16 weeks       | –                           |
| Mouse #5    | C57BL/6 | √     | 5 mm     | 16 weeks       | Sequencing                  |
| Mouse #6    | C57BL/6 | √     | 2 mm     | 16 weeks       | IHC, IF ( <b>Figure 1</b> ) |

IHC, immunohistochemistry; IF, immunofluorescence.

**Table S4** Single-cell GFP PCR statistical results

| Number    | Tumor cell | Total PCR+ | Green cell PCR+ | Non-green cell PCR+ |
|-----------|------------|------------|-----------------|---------------------|
| Mouse #5  | 25         | 17         | 5/8             | 12/17               |
| Mouse #10 | 22         | 14         | 5/11            | 9/11                |
| Mouse #17 | 9          | 6          | 2/4             | 4/5                 |
| Mouse #24 | 13         | 6          | 2/6             | 4/7                 |
| Mouse #25 | 11         | 8          | 5/7             | 3/4                 |
| Mouse #29 | 8          | 7          | 6/6             | 1/2                 |

PCR, polymerase chain reaction; GFP, green fluorescent protein.

**Table S5** DEN-induced HCC in the following validation group

| Mice number | Strain  | Tumor | Diameter | Induction time  | Application                         |
|-------------|---------|-------|----------|-----------------|-------------------------------------|
| Mouse #7    | C57BL/6 | ×     | –        | 16 weeks        | –                                   |
| Mouse #8    | C57BL/6 | ×     | –        | 12 weeks (died) | –                                   |
| Mouse #9    | C57BL/6 | ×     | –        | 16 weeks        | –                                   |
| Mouse #10   | C57BL/6 | √     | 5.5 mm   | 16 weeks        | Sequencing                          |
| Mouse #11   | C57BL/6 | ×     | –        | 16 weeks        | –                                   |
| Mouse #12   | C57BL/6 | ×     | –        | 16 weeks        | –                                   |
| Mouse #13   | C57BL/6 | ×     | –        | 16 weeks        | –                                   |
| Mouse #14   | C57BL/6 | √     | 2.5 mm   | 16 weeks        | IF ( <b>Figure 3 and S1</b> )       |
| Mouse #15   | C57BL/6 | ×     | –        | 16 weeks        | –                                   |
| Mouse #16   | C57BL/6 | ×     | –        | 16 weeks        | –                                   |
| Mouse #17   | C57BL/6 | √     | 5 mm     | 16 weeks        | Sequencing                          |
| Mouse #18   | C57BL/6 | ×     | –        | 16 weeks        | –                                   |
| Mouse #19   | C57BL/6 | ×     | –        | 16 weeks        | –                                   |
| Mouse #20   | C57BL/6 | ×     | –        | 16 weeks        | –                                   |
| Mouse #21   | C57BL/6 | ×     | –        | 16 weeks        | –                                   |
| Mouse #22   | C57BL/6 | √     | 2 mm     | 16 weeks        | IF ( <b>Figure S1</b> )             |
| Mouse #23   | C57BL/6 | ×     | –        | 16 weeks        | –                                   |
| Mouse #24   | C57BL/6 | √     | 5 mm     | 16 weeks        | Sequencing                          |
| Mouse #25   | C57BL/6 | √     | 4 mm     | 16 weeks        | Sequencing                          |
| Mouse #26   | C57BL/6 | ×     | –        | 16 weeks        | –                                   |
| Mouse #27   | C57BL/6 | ×     | –        | 16 weeks        | –                                   |
| Mouse #28   | C57BL/6 | ×     | –        | 16 weeks        | –                                   |
| Mouse #29   | C57BL/6 | √     | 2.5 mm   | 16 weeks        | Sequencing                          |
| Mouse #30   | C57BL/6 | √     | 2 mm     | 16 weeks        | IF ( <b>Figure 3 and Table S3</b> ) |
| Mouse #31   | C57BL/6 | ×     | –        | 16 weeks        | –                                   |

IF, immunofluorescence; HCC, hepatocellular carcinoma; DEN, diethylnitrosamine; √, means tumor formation; ×, means non tumor formation.

**Table S6** Important genes associated with human HCC in 6 mice

| Chromosome | Position             | Mice                              | Gene                  |
|------------|----------------------|-----------------------------------|-----------------------|
| chr1       | 155500000-195500000  | Mouse #5, #10, #24                | <i>Tert</i>           |
| chr2       | 126500000-155500000  | Mouse #5, #17, #24                | <i>Atxn1</i>          |
| chr3       | 235000000-485000000  | Mouse #5, #10, #24, #29           | <i>Nras</i>           |
| chr9       | 295000000-535000000  | Mouse #5, #10, #17, #24, #25, #29 | <i>Cb1, Cyp46a1</i>   |
|            | 645000000-1155000000 | Mouse #5, #10, #24, #25           | <i>Cyp8b1, Dkk1</i>   |
| chr11      | 540000000-670000000  | Mouse #10, #24, #29               | <i>Ctnnb1</i>         |
| chr12      | 350000000-540000000  | Mouse #5, #10, #24, #25           | <i>Arid1a, Pik3ca</i> |
|            | 770000000-1205000000 | Mouse #5, #10, #24, #25           | <i>Cdkn2a</i>         |

Chr, chromosome.
